# Supplementary material for: mPEG-PLGA Nanoparticles Labelled with Loaded or Conjugated Rhodamine-B for Potential Nose-to-Brain Delivery
Source: MDPI journal article supplement (doi:10.3390/pharmaceutics13091508), 2021-09-18
Supplement: s1 [file s1]

# mPEG-PLGA Nanoparticles Labelled with Loaded or Conjugated Rhodamine-B for Potential Nose-to-Brain Delivery

Emanuela Fabiola Craparo, Teresa Musumeci, Angela Bonaccorso, Rosalia Pellitteri, Alessia Romeo, Irina Naletova, Lorena Maria Cucci, Gennara Cavallaro and Cristina Satriano

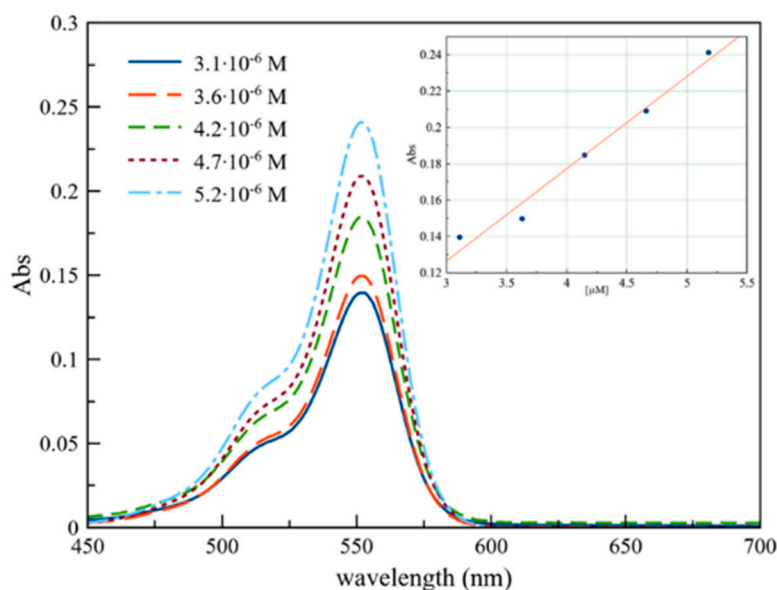

**Figure S1.** UV-vis calibration curve for RhB in Milli-Q water determined at the wavelength of the maximum of absorbance ( $\lambda = 552$  nm).

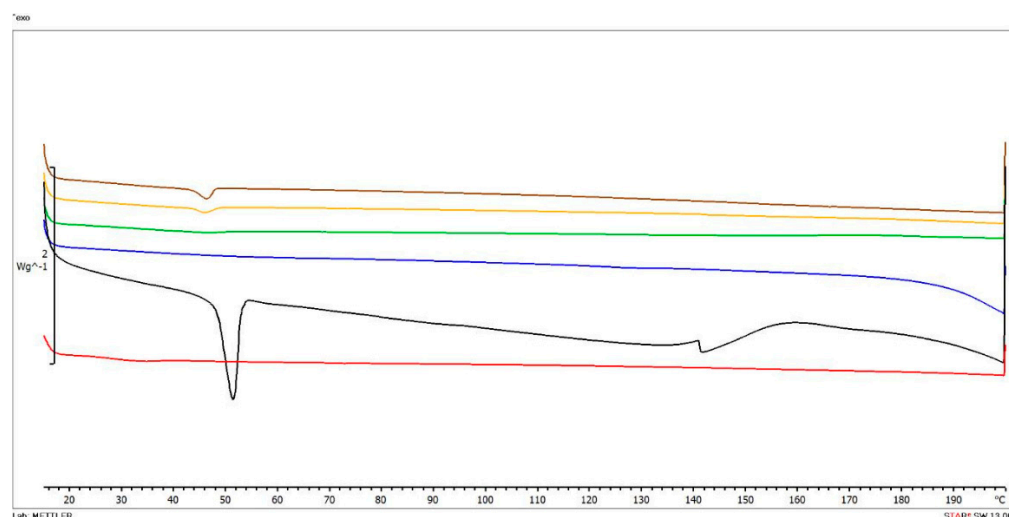

**Figure S2.** DSC thermograms of PLGA-PEG (red curve), PHEA-*g*-RhB-*g*-PLA (black curve), RhB (blue curve) as raw materials, unlabeled PNPs (green curve), loaded-PNPs (yellow curve) and grafted-PNPs (brown curve).
